# Supplementary material
Source: PubMed Central journal article supplement (PMC3402797)

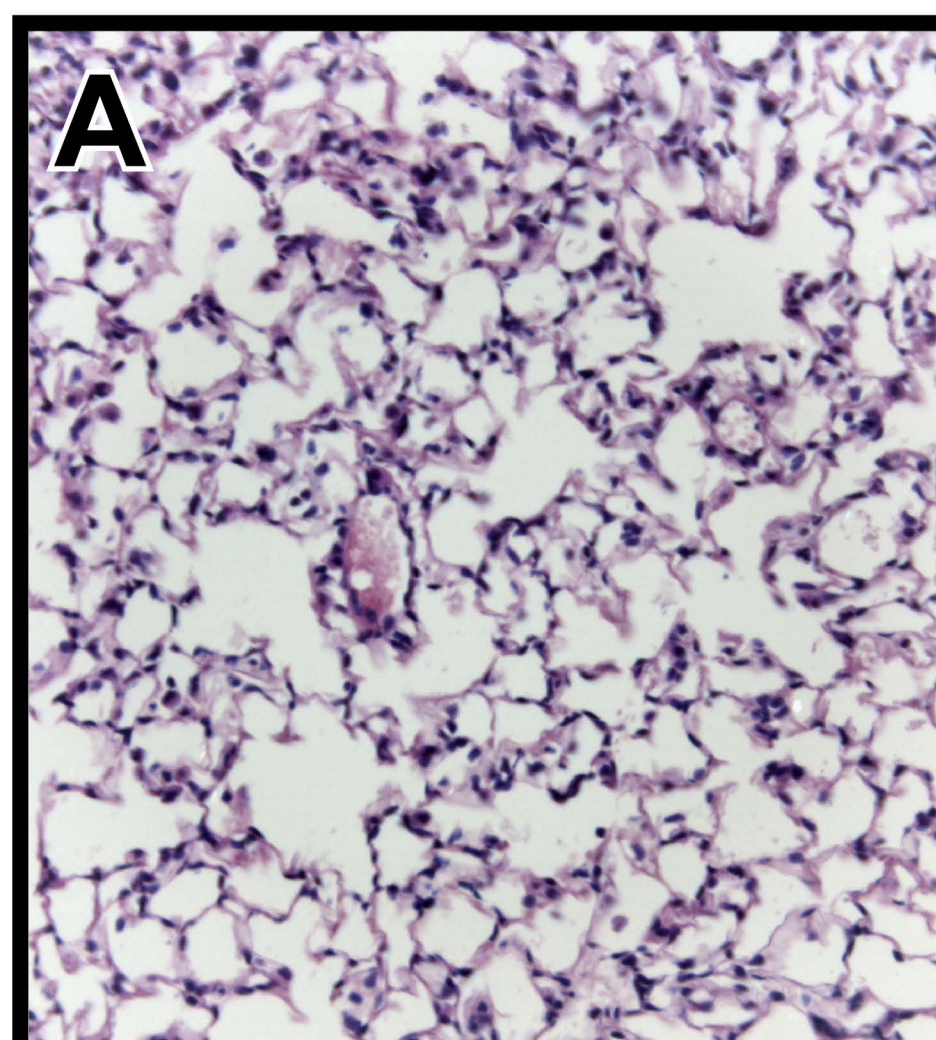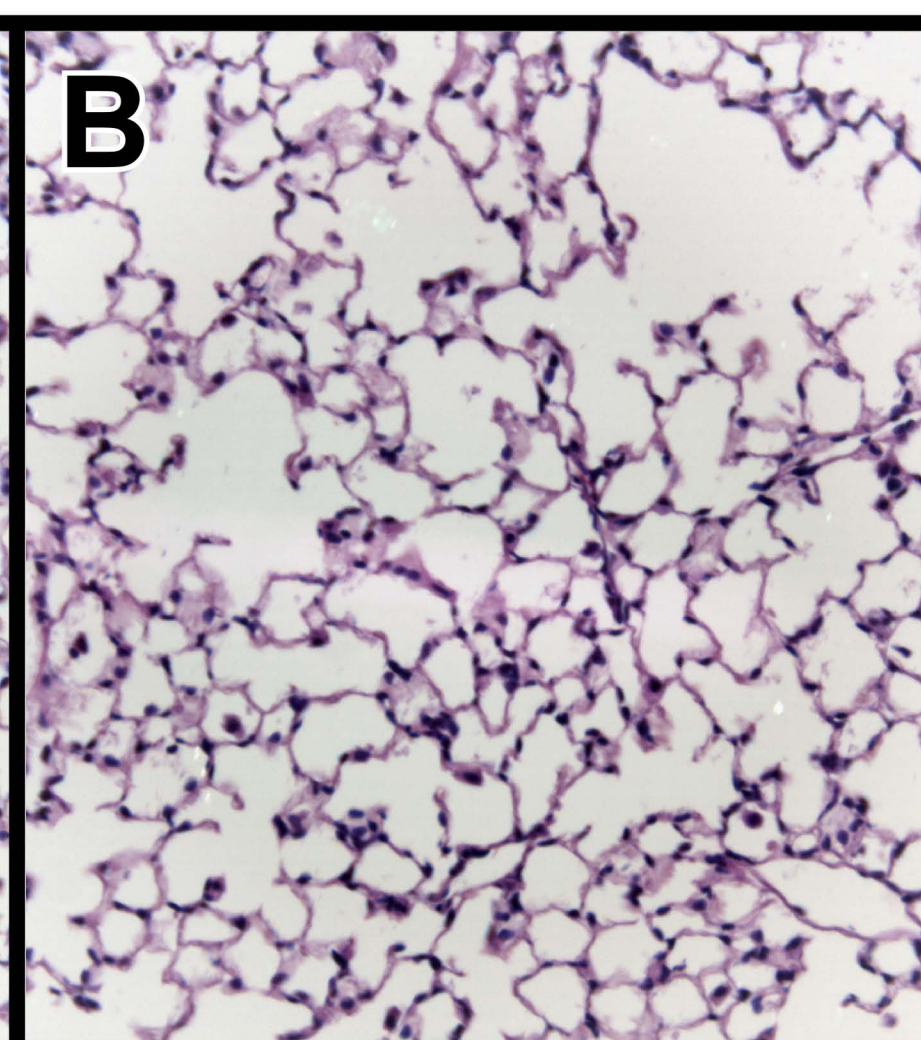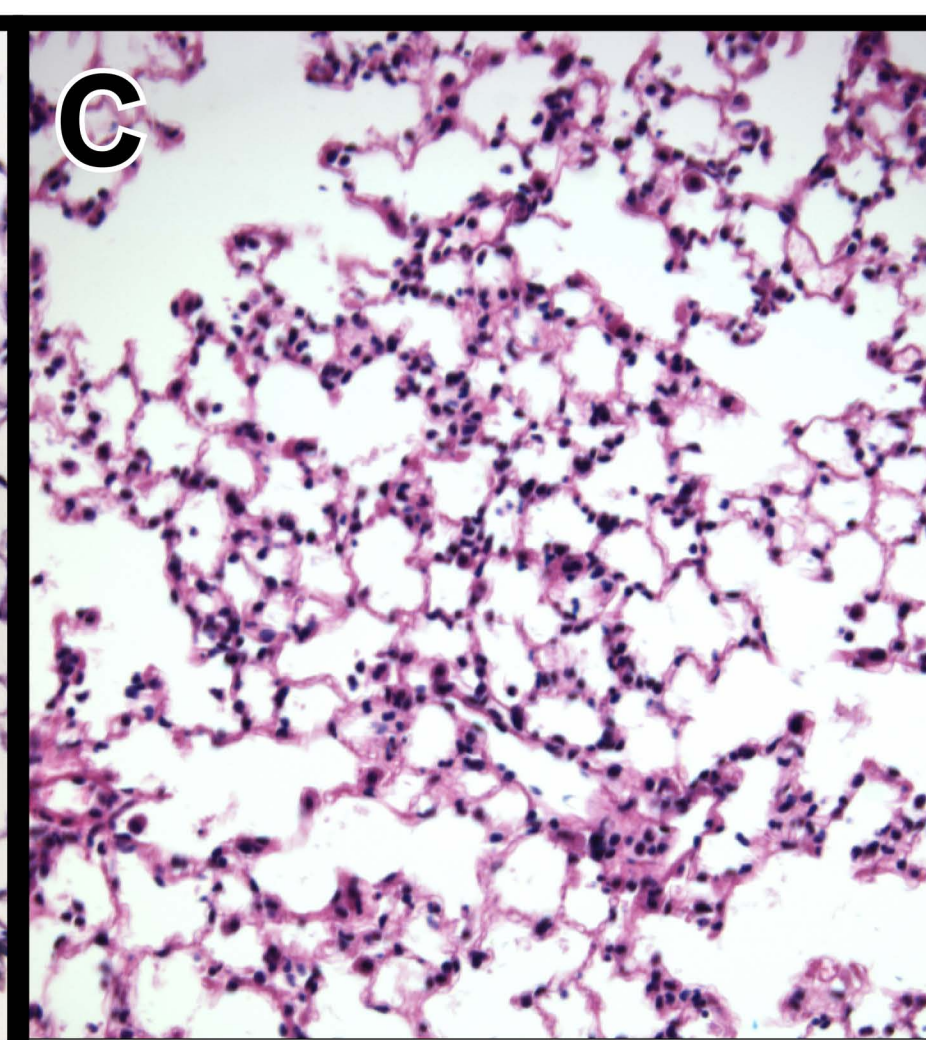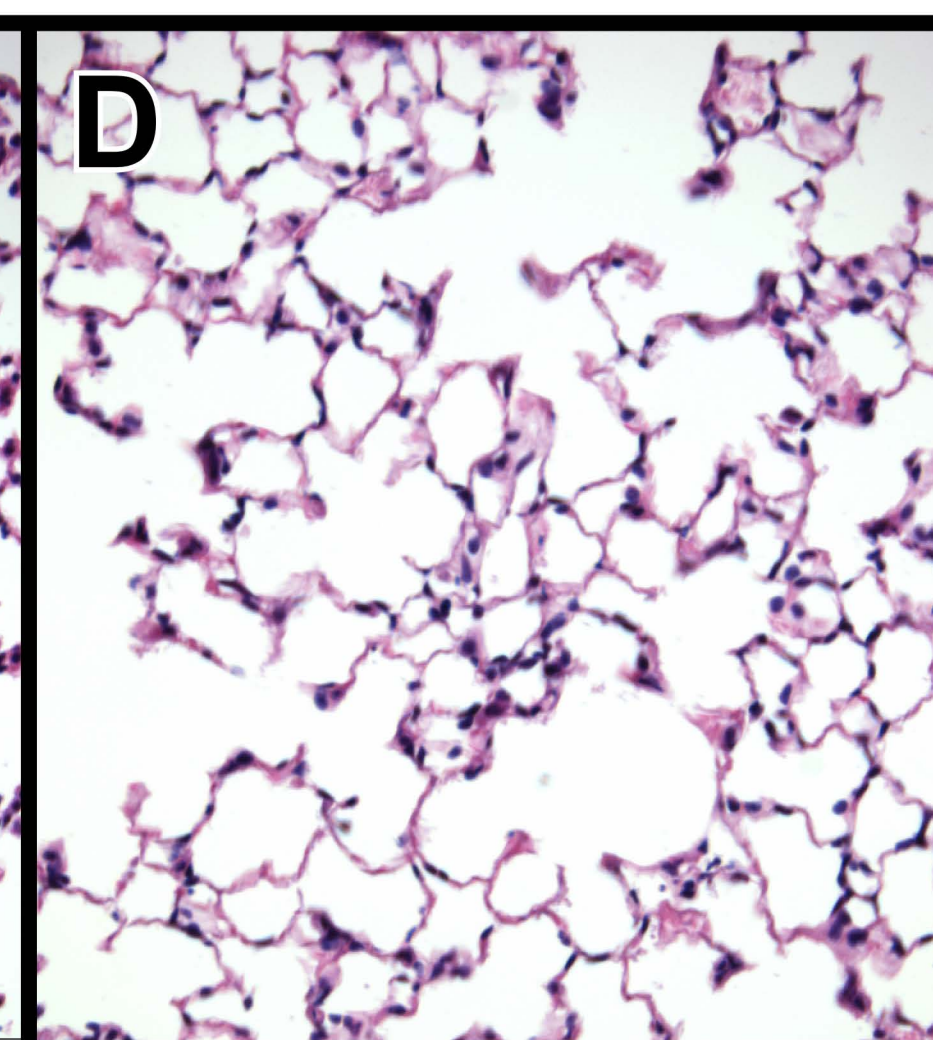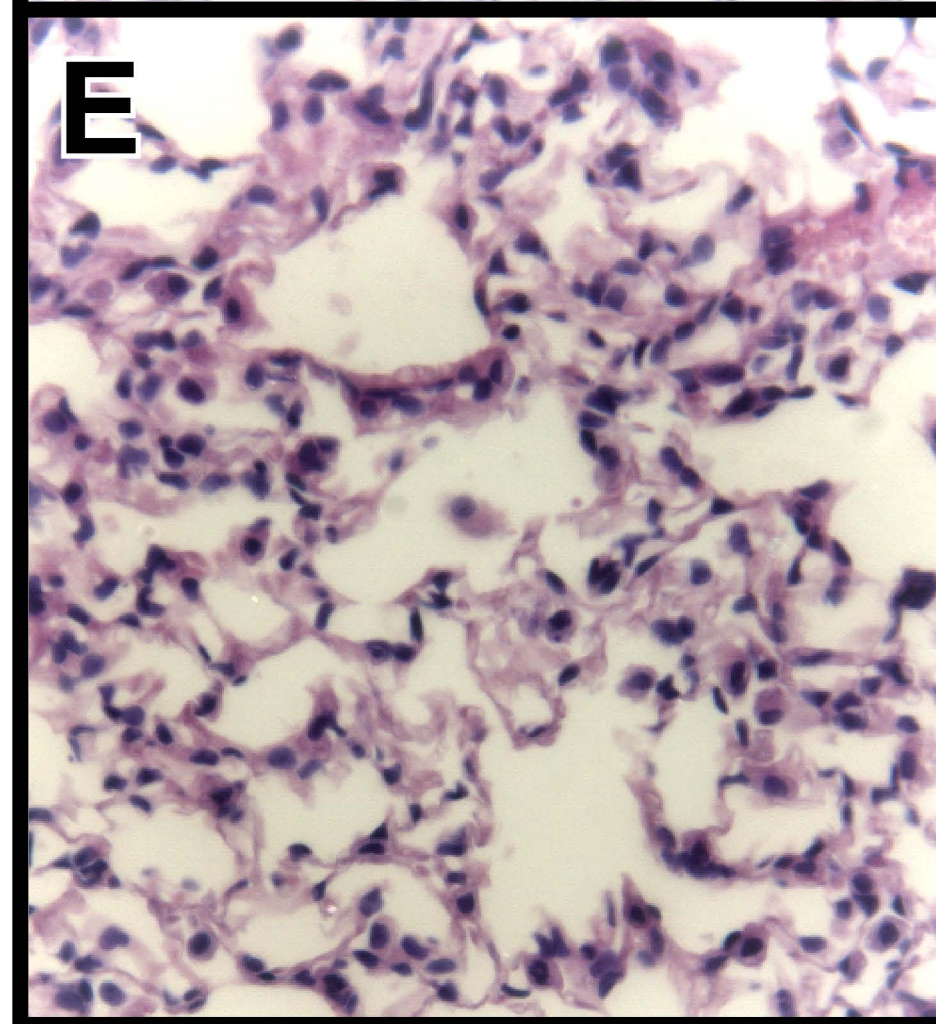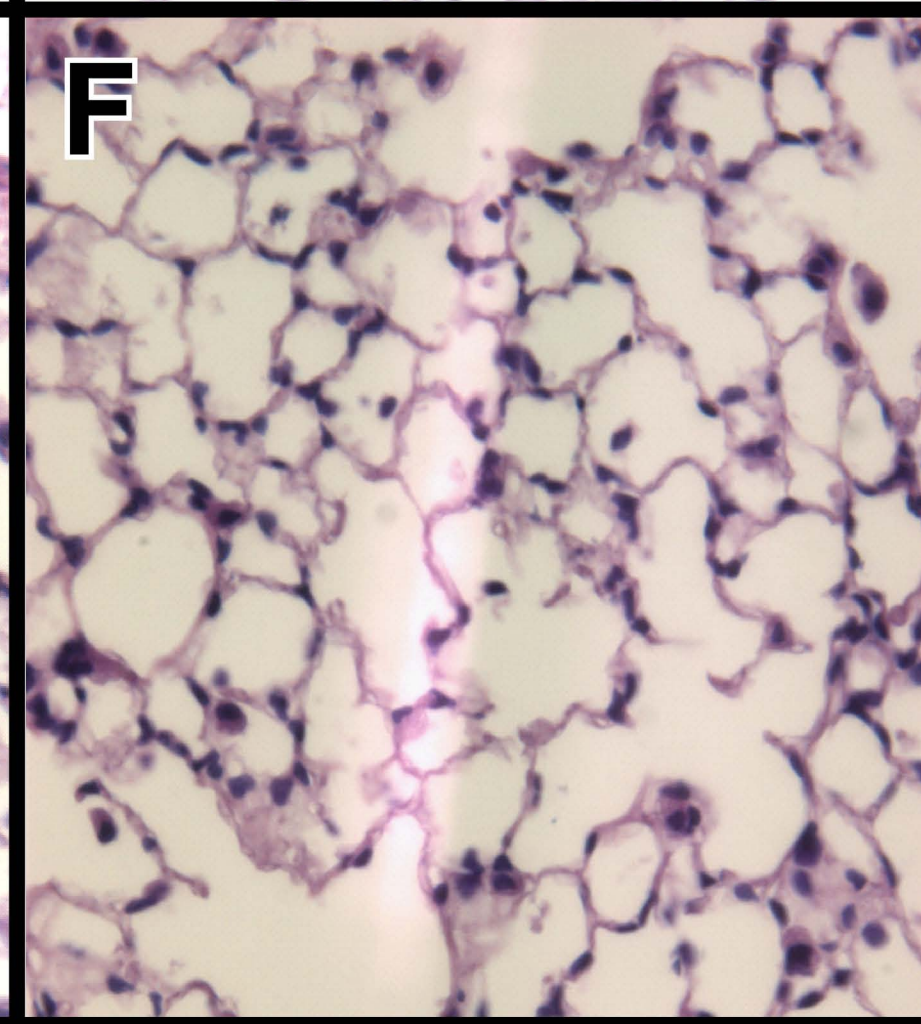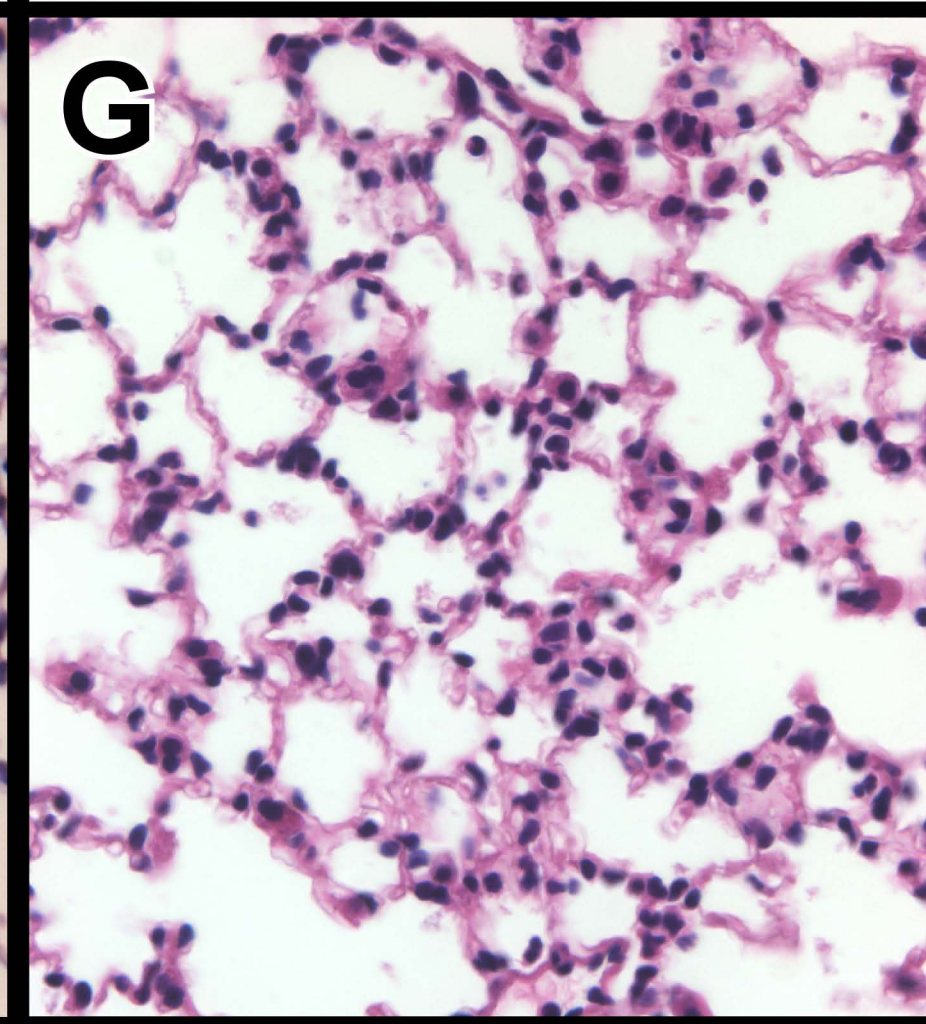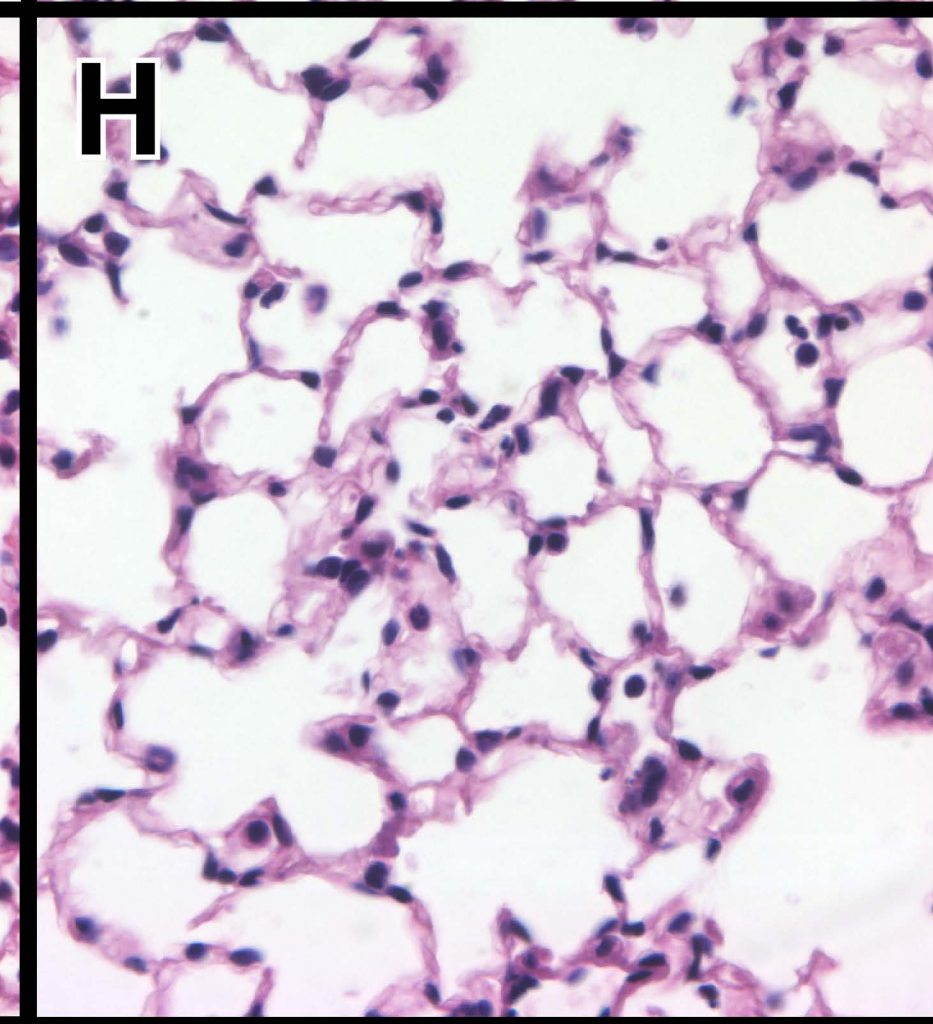



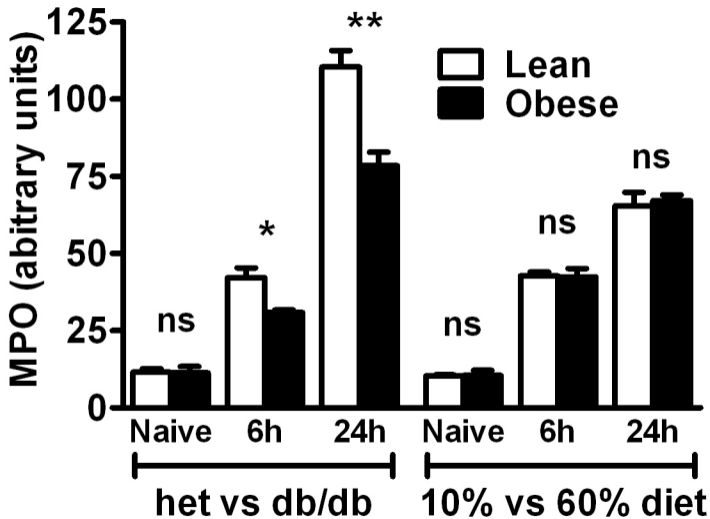

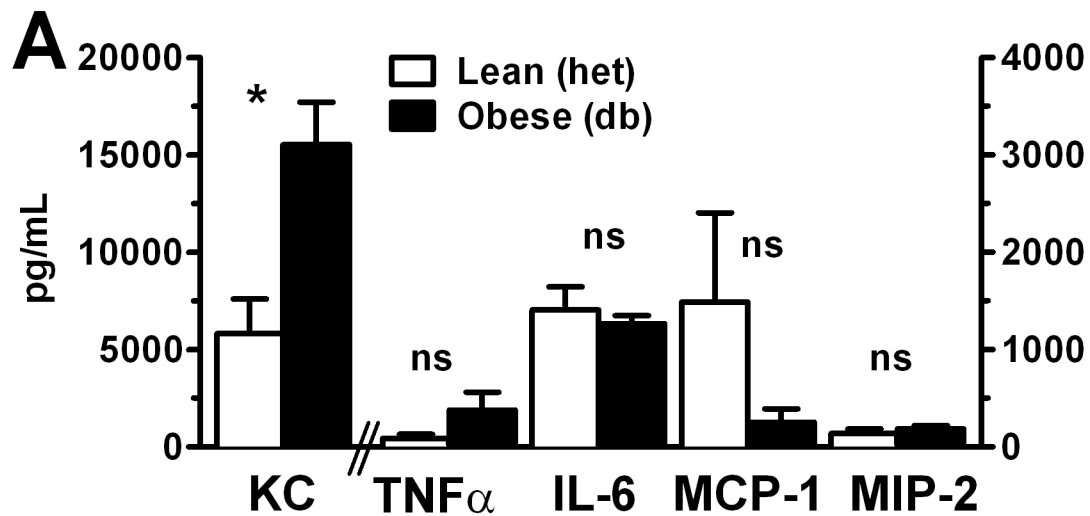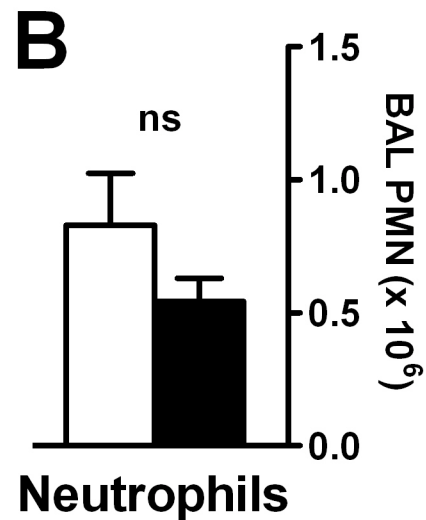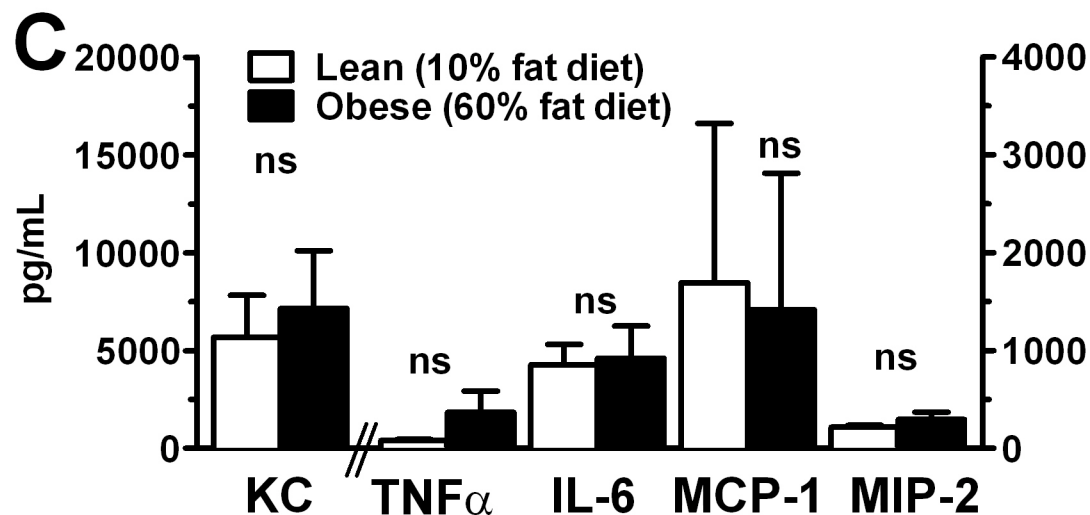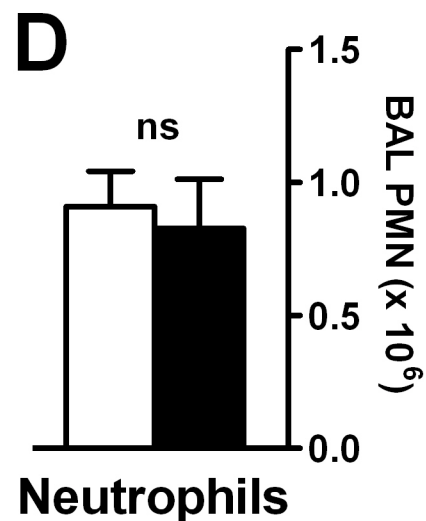

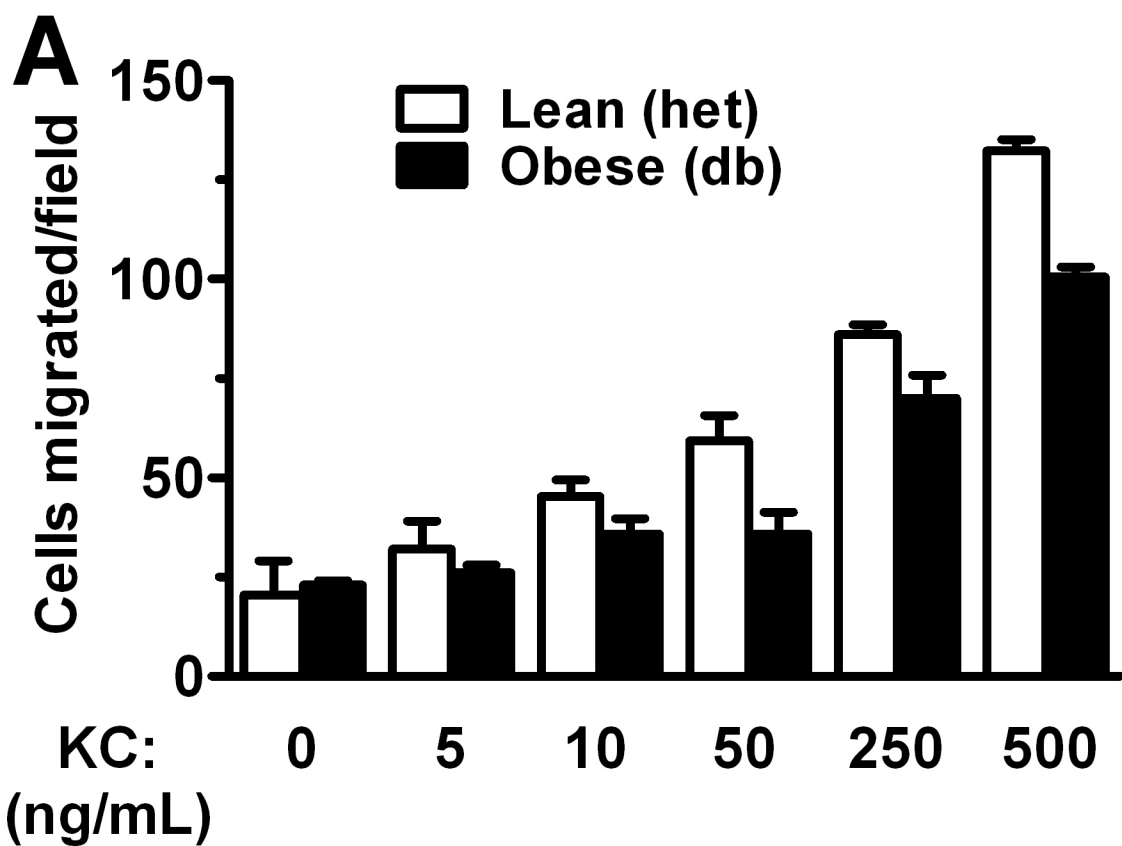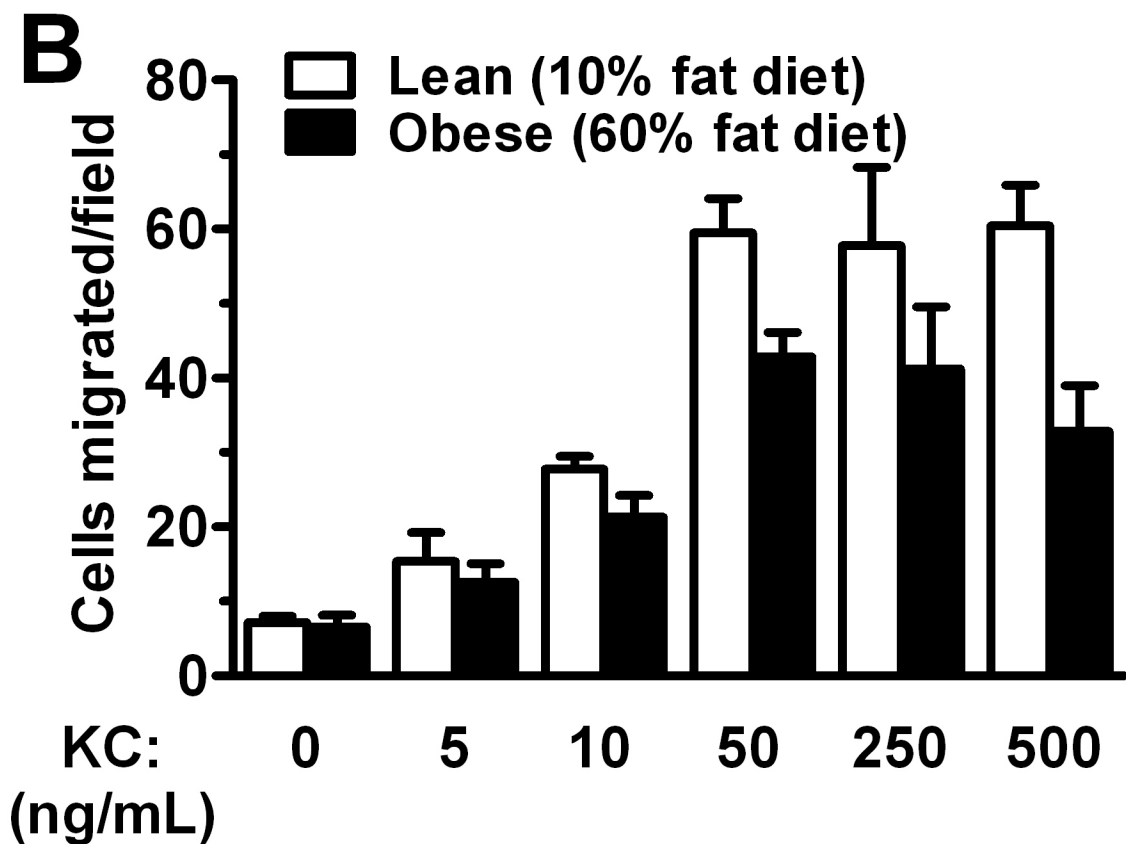

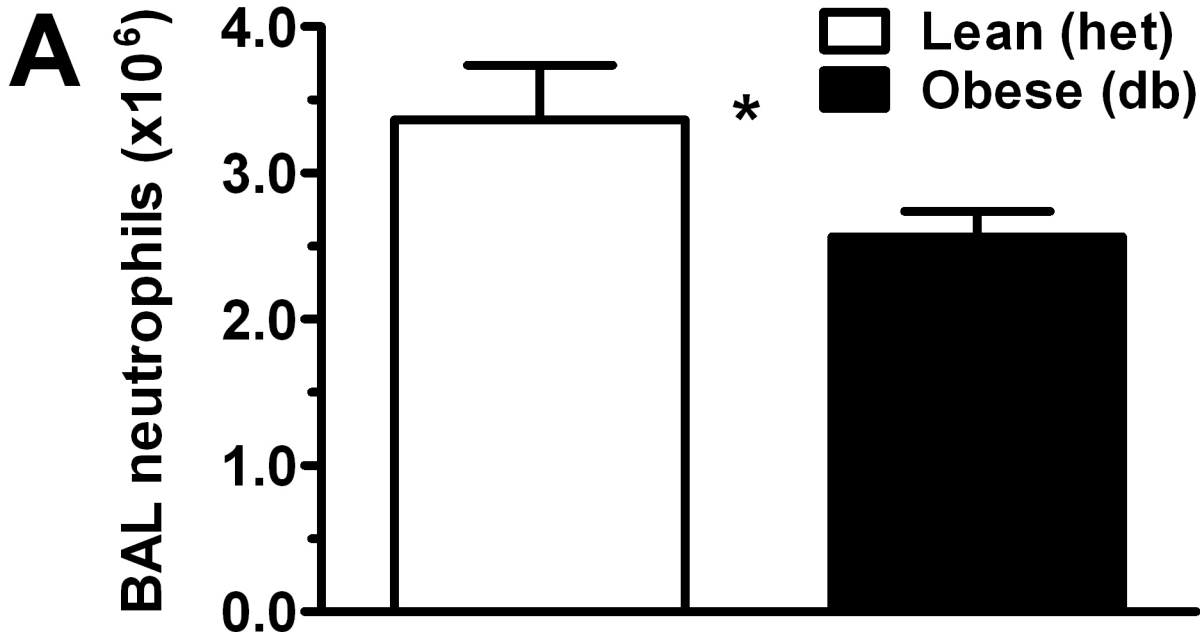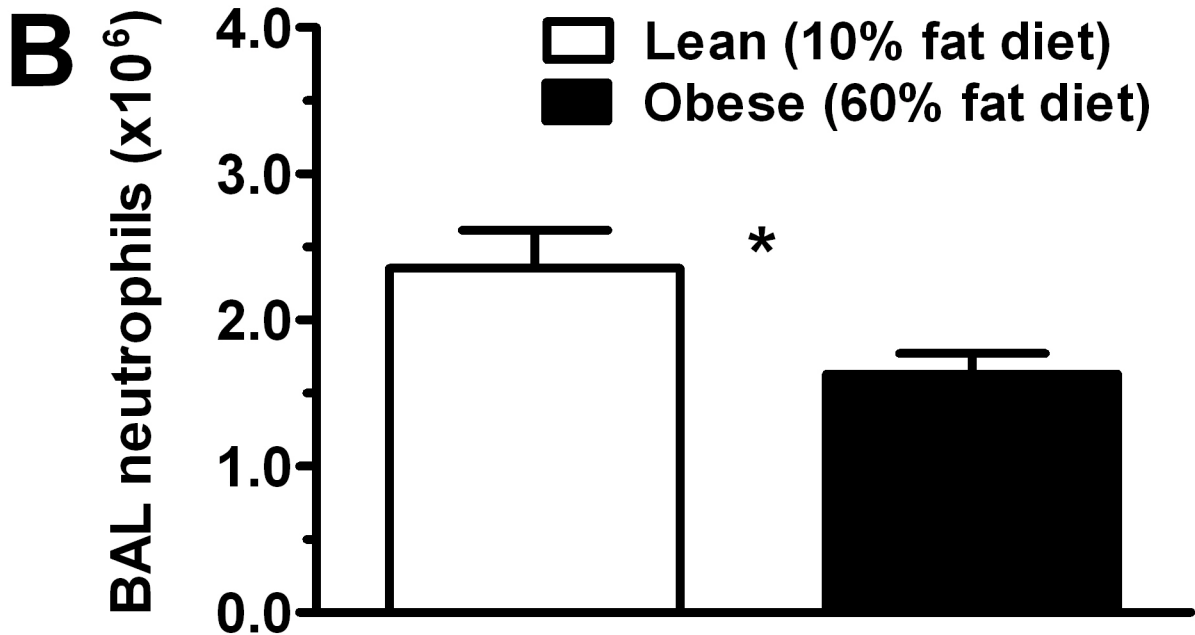

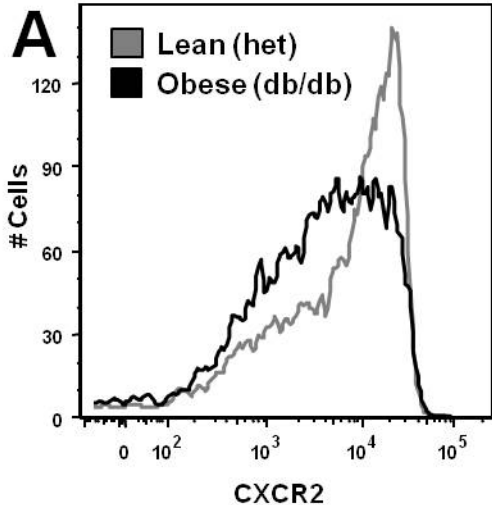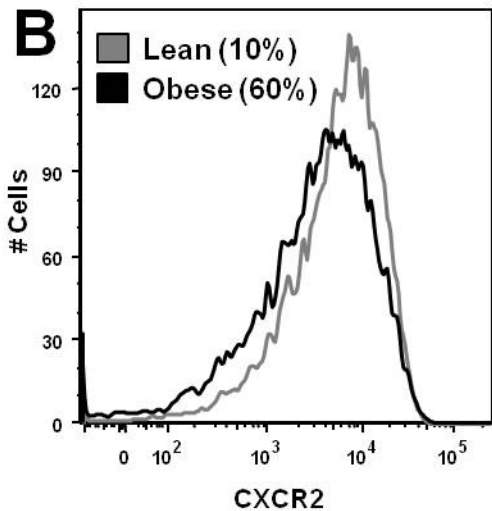

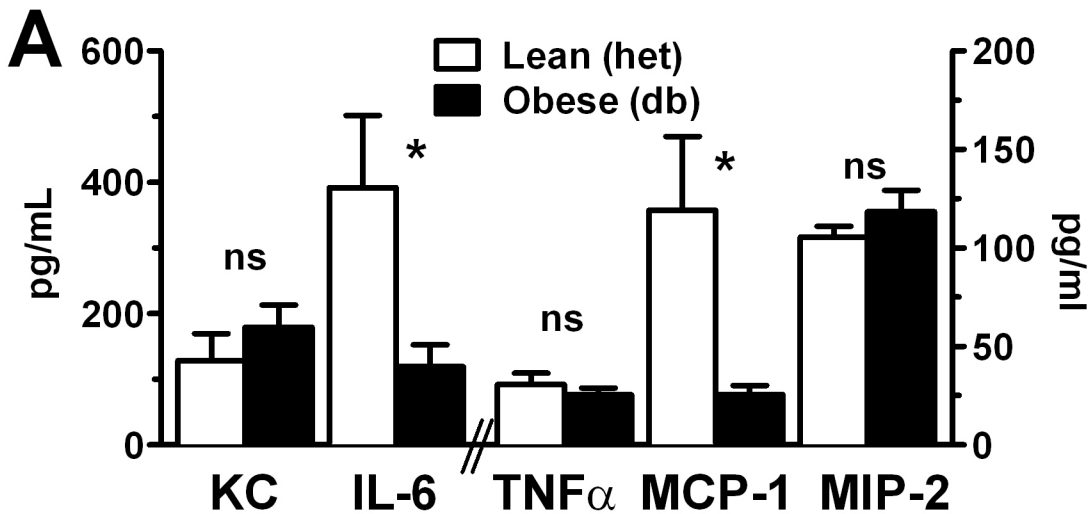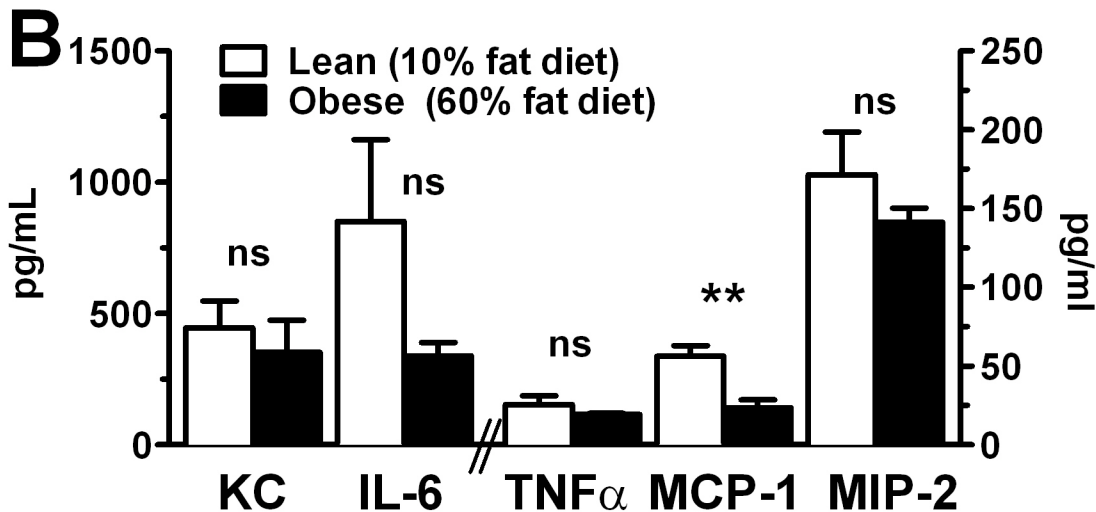

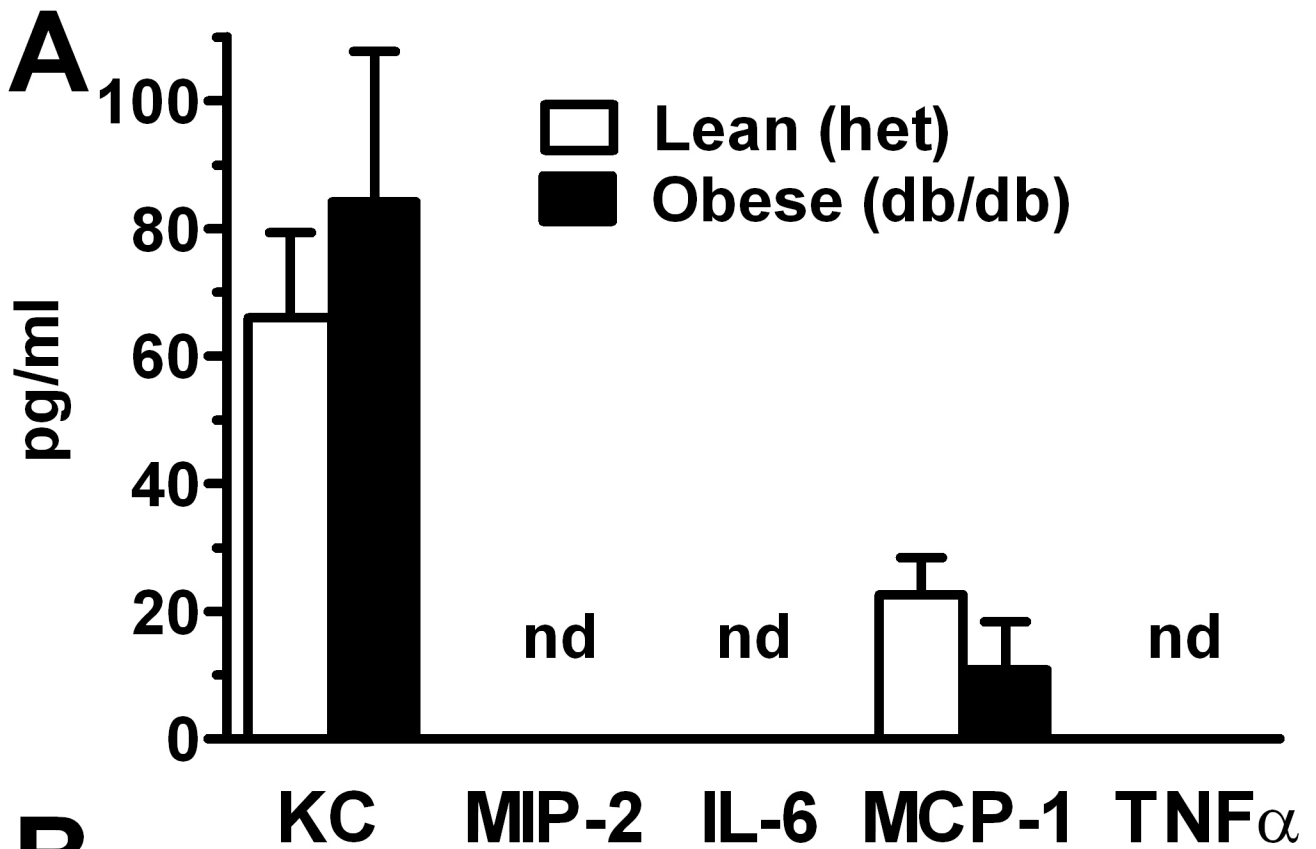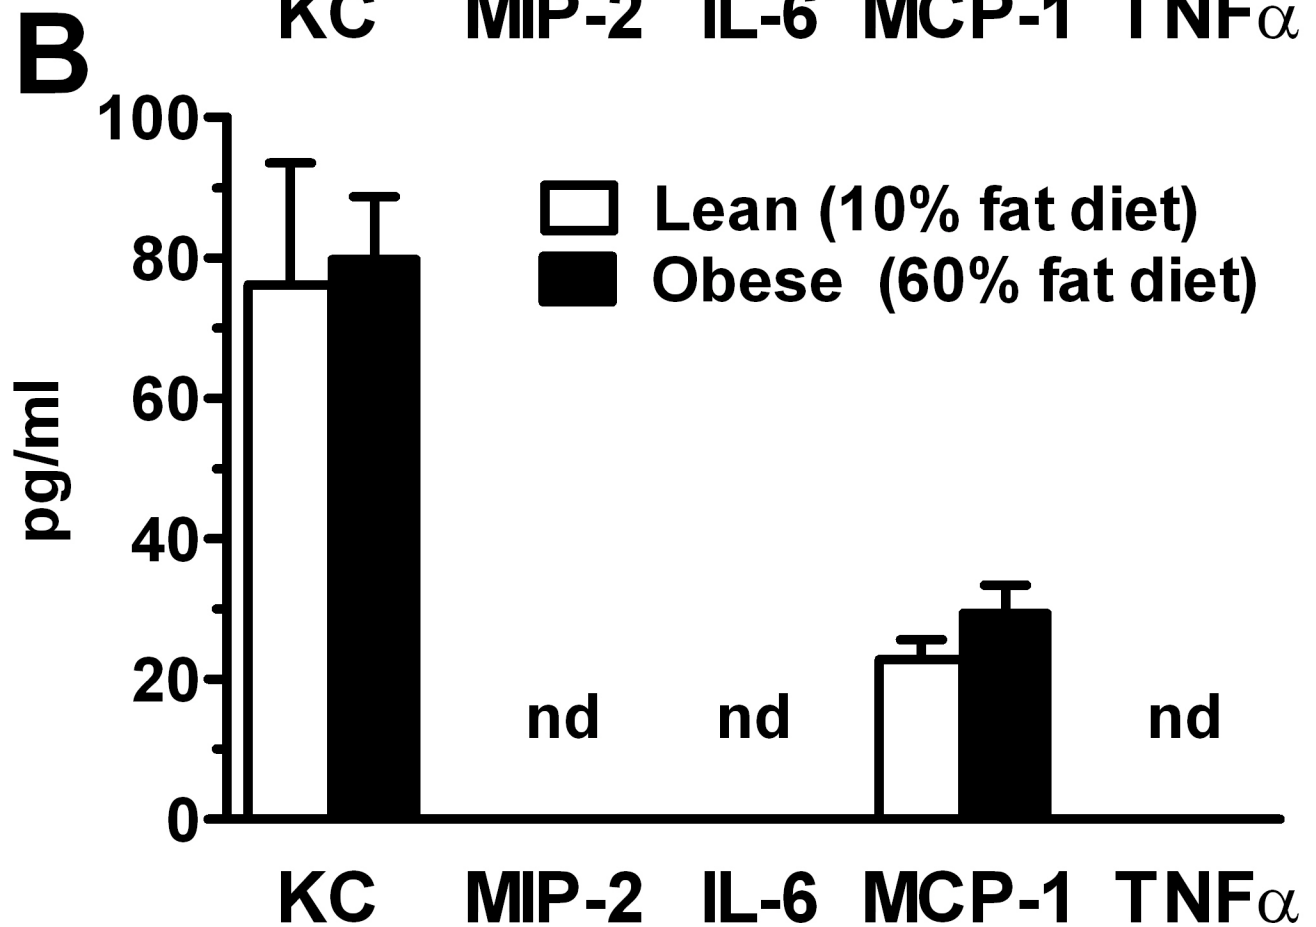



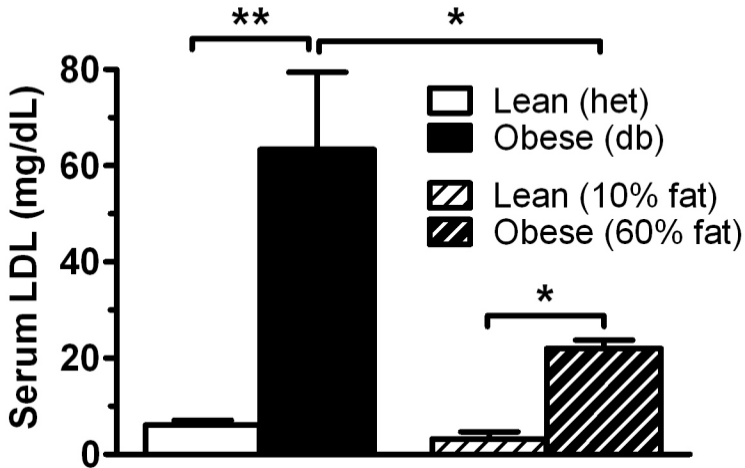

Supplement: supp_47.1.120_Kordonowy_ODS_fig_E1_-_E9.pdf [file supp_47.1.120_Kordonowy_ODS_fig_E1_-_E9.pdf]
